# Supplementary material
Source: PubMed Central journal article supplement (PMC5717216)
Supplement: AEM.01828-17_zam024178195s1.pdf [file AEM.01828-17_zam024178195s1.pdf]

**Supplementary Table S1 –**  
 Log2 transformed apex area under the curve (AUC) data for secretome samples from *C. bescii*  
 wild type  
 and strains RKCB120, RKCB121, RKCB130, and RKCB132

| Accession_ No | Protein  | WT   |      |      | RKCB120 |      |      | RKCB121 |      |      | RKCB130 |      |      | RKCB132 |      |      |
|---------------|----------|------|------|------|---------|------|------|---------|------|------|---------|------|------|---------|------|------|
|               |          | 1    | 2    | 3    | 1       | 2    | 3    | 1       | 2    | 3    | 1       | 2    | 3    | 1       | 2    | 3    |
| 643714423     | Athe_000 | 30.1 | 31.2 | 30.5 | 28.7    | 27.3 | 30.2 | 28.0    | 29.0 | 29.4 | 28.4    | 30.1 | 28.0 | 29.0    | 29.3 | 27.8 |
| 643714426     | Athe_001 | 29.9 | 30.6 | 29.9 | 30.2    | 30.3 | 30.9 | 30.0    | 30.8 | 30.6 | 30.7    | 30.2 | 30.8 | 30.0    | 30.4 | 30.1 |
| 643714442     | Athe_003 | 29.6 | 28.1 | 30.0 | 27.3    | 26.8 | 27.4 | 28.6    |      | 27.7 |         |      |      | 28.0    | 27.4 | 26.9 |
| 643714484     | Athe_007 | 29.1 | 29.0 | 28.7 | 29.4    | 29.0 | 29.8 | 29.1    | 28.7 | 28.6 | 28.2    | 28.9 | 29.6 | 28.5    | 28.2 | 28.6 |
| 643714487     | Athe_007 | 27.2 | 28.7 | 28.0 | 28.0    | 29.0 | 29.2 | 27.3    | 27.4 | 28.2 | 22.9    | 27.8 |      | 27.2    | 26.9 | 26.1 |
| 643714488     | Athe_007 | 27.4 | 26.1 | 27.0 | 26.1    |      | 26.5 |         |      |      |         | 26.2 |      | 25.9    | 25.7 | 27.1 |
| 643714492     | Athe_008 | 29.1 | 30.2 | 30.0 | 29.6    | 30.3 |      | 33.0    | 32.9 | 32.7 | 29.9    | 29.9 | 30.4 | 30.5    | 29.9 | 29.6 |
| 643714513     | Athe_010 | 28.3 | 29.4 | 27.2 | 29.8    | 30.2 | 29.8 | 30.7    | 29.2 | 30.1 | 31.1    | 30.1 | 30.8 | 29.1    | 28.6 | 27.6 |
| 643714514     | Athe_010 | 28.7 | 28.2 | 27.5 | 28.2    |      | 26.9 | 26.7    |      | 27.9 | 26.9    | 27.4 | 27.6 | 28.4    | 28.4 | 28.8 |
| 643714540     | Athe_013 |      | 27.3 | 26.3 |         |      |      |         |      |      |         |      |      |         | 26.5 |      |
| 643714563     | Athe_016 | 34.7 | 35.3 | 34.7 | 33.2    | 33.2 | 34.1 |         | 33.1 | 32.8 | 33.5    | 33.2 | 33.4 | 33.3    | 32.4 | 33.3 |
| 643714583     | Athe_018 |      |      |      |         |      |      |         |      |      |         |      |      | 23.5    |      |      |
| 643714591     | Athe_019 |      | 27.1 | 27.2 | 27.7    | 28.1 |      |         | 27.6 | 27.0 | 28.0    | 26.9 |      | 25.7    | 27.2 |      |
| 643714607     | Athe_020 | 29.6 | 28.3 | 28.9 | 28.4    | 27.0 | 27.3 |         |      |      | 27.1    | 27.8 | 27.7 | 29.0    | 28.6 | 29.3 |
| 643714617     | Athe_021 | 31.1 | 31.2 | 31.1 | 31.9    | 30.7 | 31.4 | 31.6    | 31.7 | 32.0 | 31.0    | 31.0 | 30.7 | 31.7    | 31.4 | 31.8 |
| 643714623     | Athe_022 | 31.8 | 32.9 | 31.6 | 30.2    | 29.8 | 31.7 | 31.6    | 31.3 | 31.5 | 32.1    | 29.9 | 29.9 | 28.2    | 30.0 | 30.3 |
| 643714671     | Athe_027 | 30.3 | 29.2 | 28.2 |         |      | 28.8 | 28.7    |      |      | 28.3    |      | 27.8 | 28.8    | 27.5 | 28.2 |
| 643714687     | Athe_029 | 33.8 | 32.5 | 33.2 | 31.4    | 29.0 | 32.3 | 33.5    | 32.0 | 32.8 | 33.2    |      |      | 31.5    | 32.0 | 33.1 |
| 643714731     | Athe_034 | 30.7 | 31.2 | 30.8 | 29.2    |      | 26.4 |         |      |      |         |      | 26.8 | 27.0    | 28.1 | 24.5 |
| 643714821     | Athe_043 | 27.0 | 29.2 | 27.2 | 26.8    | 29.9 | 28.7 | 29.9    | 30.4 | 30.1 | 27.6    | 29.5 | 29.4 | 28.7    | 28.7 | 28.3 |
| 643714825     | Athe_043 | 25.6 | 25.1 | 27.5 | 28.0    | 26.8 | 26.7 | 26.3    | 26.5 | 27.3 |         | 27.4 | 26.7 | 26.0    | 21.6 | 27.2 |
| 643714847     | Athe_045 | 28.0 | 26.9 | 28.5 | 27.9    | 25.6 |      |         |      |      | 26.8    | 28.1 |      | 29.2    | 29.3 | 28.3 |
| 643714848     | Athe_046 | 30.3 | 28.4 | 29.1 | 29.0    |      | 27.6 |         | 26.0 |      | 29.3    | 29.4 | 28.8 | 30.2    | 29.8 | 28.9 |
| 643714866     | Athe_047 | 28.3 | 29.7 | 28.8 |         |      |      |         |      |      |         |      |      |         | 27.3 | 27.2 |
| 643714905     | Athe_052 |      |      | 26.3 |         |      |      |         |      |      | 26.8    | 25.4 |      | 25.9    | 25.1 |      |
| 643714913     | Athe_053 | 27.7 | 27.2 |      |         |      |      |         |      |      |         |      |      |         |      |      |
| 643714917     | Athe_053 | 28.5 | 29.8 | 29.5 |         | 28.7 | 29.2 |         |      | 28.4 | 31.3    | 28.9 | 27.1 | 30.0    | 30.4 | 27.9 |
| 643714977     | Athe_059 | 30.5 | 31.0 | 30.5 | 29.4    | 27.8 | 28.3 |         | 27.7 | 27.6 | 28.6    | 28.2 | 28.5 | 27.4    | 28.8 | 28.9 |
| 643714980     | Athe_059 | 33.7 | 34.9 | 34.0 | 35.2    | 35.1 | 35.7 | 35.1    | 35.2 | 35.3 | 35.1    | 35.1 | 35.0 | 34.7    | 34.2 | 34.2 |
| 643714992     | Athe_061 |      |      |      |         |      | 28.2 |         | 26.2 | 27.7 | 26.8    | 27.4 | 29.8 | 22.9    | 25.0 | 26.8 |
| 643714995     | Athe_061 | 28.8 | 28.9 | 28.5 | 30.9    |      |      |         |      | 29.8 |         |      |      |         |      |      |
| 643715006     | Athe_062 | 29.6 | 30.3 | 29.4 | 28.0    | 26.7 | 28.5 |         |      | 26.7 | 30.4    | 28.5 | 28.6 | 29.4    | 29.5 | 29.2 |
| 643715020     | Athe_063 | 27.8 |      |      | 27.9    | 27.7 | 28.6 |         | 28.4 |      | 28.2    | 28.2 |      |         | 28.1 | 27.6 |
| 643715045     | Athe_066 |      |      |      | 29.6    |      | 29.2 |         |      |      |         | 29.6 | 29.2 | 29.6    | 29.4 | 30.7 |
| 643715048     | Athe_066 | 34.7 | 37.3 | 36.1 | 33.4    | 33.7 | 34.6 | 32.1    | 33.0 | 33.1 | 34.6    | 35.0 | 34.2 | 34.4    | 34.1 | 34.6 |
| 643715081     | Athe_070 |      | 29.4 |      |         |      |      |         |      |      |         |      |      | 25.5    |      |      |
| 643715143     | Athe_076 | 27.0 |      | 23.3 |         |      |      |         |      |      | 23.2    |      |      | 25.8    | 25.0 | 25.8 |
| 643715202     | Athe_082 | 27.8 | 29.1 | 28.4 |         |      |      |         |      |      |         |      |      | 26.7    |      | 26.5 |

|           |          |      |      |      |      |      |      |      |      |      |      |      |      |      |      |      |      |
|-----------|----------|------|------|------|------|------|------|------|------|------|------|------|------|------|------|------|------|
| 643715221 | Athe_084 | 28.9 |      | 27.9 |      |      |      |      |      |      |      |      |      |      |      | 27.6 |      |
| 643715263 | Athe_088 | 31.2 | 33.2 | 32.5 | 30.0 | 31.9 | 31.6 |      |      | 31.4 |      | 32.6 | 31.3 | 31.0 | 30.9 | 30.8 |      |
| 643715277 | Athe_090 | 33.3 | 32.7 | 32.2 | 34.3 |      |      |      | 29.8 | 31.0 | 33.2 | 32.9 | 32.1 | 30.2 | 30.4 | 30.5 |      |
| 643715278 | Athe_090 | 34.6 | 35.3 | 33.6 | 27.7 | 26.8 | 27.4 |      |      | 33.2 | 33.2 | 34.1 | 33.5 | 34.3 | 33.5 | 33.6 |      |
| 643715311 | Athe_094 | 33.5 | 31.4 | 30.8 | 29.6 | 29.3 | 30.6 | 30.1 | 27.8 | 29.5 | 31.7 | 30.9 |      | 28.6 | 27.9 | 27.8 |      |
| 643715312 | Athe_094 | 31.3 | 31.0 | 31.4 |      | 30.3 |      |      | 30.6 | 31.0 | 31.2 | 30.8 | 31.5 | 30.5 | 30.3 | 30.5 |      |
| 643715363 | Athe_099 | 33.2 | 33.1 | 32.4 | 30.2 | 29.4 |      | 25.4 |      | 30.1 | 30.5 | 28.8 | 30.3 | 31.6 | 32.0 | 32.7 |      |
| 643715434 | Athe_106 | 29.5 | 28.0 |      | 28.8 |      |      |      |      |      |      |      |      |      |      | 30.2 |      |
| 643715446 | Athe_108 | 26.5 | 28.7 | 27.6 |      | 24.0 |      |      | 25.4 | 24.8 | 23.3 | 28.1 | 28.4 | 26.0 | 26.3 |      |      |
| 643715475 | Athe_110 | 29.1 | 29.3 | 28.9 | 28.5 |      | 28.4 |      |      |      | 28.6 |      |      | 28.6 | 28.8 | 29.7 |      |
| 643715524 | Athe_115 | 29.5 | 28.3 | 28.7 |      |      |      |      |      |      |      |      |      | 28.9 |      |      |      |
| 643715530 | Athe_116 | 32.3 | 30.6 | 30.9 | 31.9 | 31.6 |      |      |      | 30.7 | 32.5 | 31.0 |      | 31.3 | 31.2 | 32.6 |      |
| 643715535 | Athe_117 | 28.2 | 27.5 |      |      |      |      |      |      |      |      |      |      |      |      |      |      |
| 643715601 | Athe_123 |      |      | 27.4 |      |      |      |      |      |      |      |      |      |      |      | 27.2 |      |
| 643715628 | Athe_126 | 30.4 |      | 29.4 |      | 29.1 |      | 28.5 |      |      |      |      |      |      |      | 29.7 |      |
| 643715671 | Athe_130 | 29.5 | 28.8 | 27.6 | 26.7 |      |      |      |      |      |      | 27.9 |      | 27.1 | 28.5 | 28.8 |      |
| 643715714 | Athe_134 | 28.2 | 28.8 | 28.0 | 27.7 | 27.1 | 27.3 |      | 28.4 | 28.0 | 28.6 | 28.1 | 28.0 | 27.5 | 26.8 | 27.9 |      |
| 643715721 | Athe_135 | 29.8 | 30.5 | 29.2 | 29.3 | 29.3 | 30.5 | 28.8 | 31.0 | 29.8 | 30.4 | 30.0 | 29.2 | 29.7 | 30.9 | 30.4 |      |
| 643715725 | Athe_136 | 30.2 | 30.1 | 29.5 | 28.9 | 27.4 | 28.4 |      | 27.0 | 27.7 | 26.7 | 28.3 |      | 28.7 |      | 27.0 |      |
| 643715729 | Athe_136 | 30.3 | 31.8 | 30.5 | 30.1 | 30.1 | 30.9 | 26.9 | 30.1 | 30.1 | 30.7 | 30.7 | 31.0 | 30.1 | 30.1 | 30.2 |      |
| 643715787 | Athe_142 | 29.3 | 29.8 | 29.3 | 25.3 |      |      |      |      |      | 27.1 | 27.3 |      | 29.1 | 30.0 | 28.7 |      |
| 643715817 | Athe_145 | 26.2 | 29.8 | 29.5 | 26.8 | 26.7 | 28.0 |      |      | 26.1 | 27.9 | 26.8 | 27.8 |      |      | 26.6 |      |
| 643715879 | Athe_151 | 25.7 | 28.4 | 26.7 | 27.4 |      | 27.8 |      |      |      |      | 27.8 |      | 27.0 |      |      |      |
| 643715892 | Athe_152 | 30.8 | 30.7 | 30.1 | 27.0 |      | 25.9 |      |      | 28.6 | 26.8 | 29.6 | 29.0 | 29.7 | 29.5 | 29.9 |      |
| 643715913 | Athe_154 | 28.0 | 28.4 | 27.4 | 25.2 |      |      |      |      |      |      |      |      | 24.2 | 26.0 |      |      |
| 643715941 | Athe_156 | 30.9 | 30.9 |      | 28.2 | 29.2 | 29.6 |      | 28.5 | 28.8 |      | 29.4 | 29.8 | 30.0 | 30.1 | 29.9 |      |
| 643715944 | Athe_157 | 29.2 | 30.1 | 29.6 | 29.5 | 29.7 | 29.3 |      |      |      | 28.6 | 29.8 | 29.2 | 30.5 | 29.3 | 29.5 |      |
| 643715999 | Athe_163 | 27.9 | 27.6 | 26.7 |      |      |      |      | 22.9 |      |      |      |      | 26.2 |      | 27.1 |      |
| 643716022 | Athe_165 | 25.8 |      | 24.1 |      |      | 28.0 |      |      |      |      |      |      |      |      | 22.6 |      |
| 643716103 | Athe_172 | 30.1 | 30.9 | 30.5 | 31.4 | 30.8 |      |      | 29.8 | 29.2 | 29.7 | 30.9 | 27.5 | 29.8 | 30.2 | 30.4 |      |
| 643716120 | Athe_174 | 32.4 | 31.0 | 30.0 | 29.9 | 29.0 | 28.9 |      | 28.5 | 29.2 | 27.4 | 29.9 | 29.6 | 31.1 | 30.4 | 30.9 |      |
| 643716138 | Athe_176 | 31.3 | 32.6 | 31.5 | 32.5 | 33.0 | 33.5 | 33.2 | 33.2 | 34.2 | 32.0 | 32.3 | 32.5 | 33.0 | 32.7 | 32.1 |      |
| 643716139 | Athe_176 | 27.5 | 28.7 | 27.9 | 29.1 | 29.7 | 30.0 | 31.2 | 31.9 | 31.8 | 29.9 | 28.9 | 29.3 | 29.5 | 29.9 | 29.7 |      |
| 643716145 | Athe_176 | 27.2 | 27.7 | 25.4 | 23.1 |      | 23.1 | 23.4 |      | 29.3 | 26.9 | 23.0 | 23.4 | 26.1 | 26.9 | 28.0 |      |
| 643716160 | Athe_178 |      |      |      | 29.8 | 29.5 |      |      |      | 29.0 | 30.3 |      |      |      | 29.1 |      |      |
| 643716180 | Athe_180 | 29.8 |      |      |      |      |      |      |      |      |      |      |      | 29.3 | 29.8 | 29.5 | 30.4 |
| 643716225 | Athe_185 | 28.5 | 29.0 | 28.2 | 30.5 | 29.5 | 29.1 | 25.8 | 27.0 | 27.5 | 28.9 | 31.0 | 30.4 | 30.0 | 25.6 | 29.3 |      |
| 643716226 | Athe_185 | 33.3 | 33.2 | 34.1 | 34.8 | 34.0 | 35.3 | 33.7 | 34.3 | 34.5 | 35.2 | 35.1 | 35.1 | 33.4 | 33.6 | 34.0 |      |
| 643716227 | Athe_185 | 26.7 |      |      |      | 28.3 |      |      |      |      |      | 29.7 |      |      | 24.2 | 25.5 |      |
| 643716229 | Athe_185 | 26.3 | 28.2 | 27.5 | 29.8 | 30.6 | 31.4 |      |      |      | 31.2 | 32.0 | 31.7 | 29.9 | 30.0 | 29.5 |      |
| 643716231 | Athe_185 | 26.1 | 26.7 | 25.7 | 29.4 | 28.3 | 29.6 |      |      |      |      |      |      |      |      |      |      |
| 643716233 | Athe_186 |      | 30.5 |      | 29.4 | 30.7 | 31.8 |      | 30.1 | 30.9 | 32.1 | 31.5 | 30.7 | 30.3 | 31.0 | 31.0 |      |
| 643716237 | Athe_186 | 23.9 |      |      | 28.9 | 28.6 | 29.4 |      | 30.1 | 29.2 | 28.7 | 28.6 | 26.7 |      |      | 22.5 |      |
| 643716238 | Athe_186 | 25.1 | 21.3 |      | 28.7 | 28.3 | 29.0 |      |      | 30.1 | 29.2 | 28.8 | 29.2 | 27.5 |      |      |      |

|           |          |      |      |      |      |      |      |      |      |      |      |      |      |      |      |      |      |
|-----------|----------|------|------|------|------|------|------|------|------|------|------|------|------|------|------|------|------|
| 643716239 | Athe_186 | 31.2 | 31.7 | 31.2 |      |      |      |      |      |      |      |      |      |      | 31.1 | 30.6 | 30.6 |
| 643716241 | Athe_186 | 32.0 | 32.2 | 31.7 | 30.4 | 29.8 | 30.2 | 25.6 | 30.2 | 29.9 | 29.9 | 28.5 | 29.2 | 30.4 | 30.8 | 31.5 |      |
| 643716242 | Athe_187 | 27.5 | 28.9 | 27.4 | 28.4 | 29.0 | 29.5 | 27.6 |      | 27.7 | 26.7 | 28.0 | 27.8 |      | 26.5 | 24.7 |      |
| 643716252 | Athe_188 |      |      | 30.5 | 32.7 | 32.6 | 33.5 |      |      |      |      | 32.3 | 31.7 | 31.9 | 31.3 | 31.5 |      |
| 643716285 | Athe_191 | 27.9 | 28.5 | 27.5 | 30.8 | 31.9 | 31.3 | 30.8 | 31.4 | 30.5 | 31.8 | 30.7 | 31.4 | 30.0 | 30.2 | 29.7 |      |
| 643716290 | Athe_191 | 31.7 | 31.2 | 30.9 | 29.8 | 29.5 | 29.6 |      | 28.4 | 29.3 |      | 28.5 | 29.6 |      | 29.5 |      |      |
| 643716296 | Athe_192 | 30.9 | 31.7 | 31.1 | 28.6 | 31.3 | 29.9 | 30.1 | 31.2 | 31.7 | 30.9 | 30.5 | 30.8 | 29.3 | 27.9 | 28.9 |      |
| 643716485 | Athe_212 | 27.9 | 29.5 | 29.1 | 28.4 | 28.0 | 29.1 | 25.4 | 26.9 | 27.8 | 28.6 | 28.2 | 28.0 | 27.2 | 27.3 | 28.2 |      |
| 643716538 | Athe_217 | 29.0 | 31.2 | 31.1 | 28.9 | 27.9 | 29.3 | 29.3 | 29.4 | 30.1 | 30.0 | 29.0 | 29.2 | 29.4 | 29.7 | 28.1 |      |
| 643716603 | Athe_223 |      |      | 24.3 |      |      |      |      |      |      |      |      |      | 23.4 | 26.5 | 27.3 |      |
| 643716606 | Athe_224 | 27.3 | 29.0 | 28.9 | 24.3 | 25.3 | 26.7 |      |      | 25.9 | 27.7 | 26.2 | 28.7 | 28.1 | 29.5 | 29.5 |      |
| 643716630 | Athe_226 | 26.8 | 27.4 |      |      |      | 28.0 |      | 28.3 | 27.6 |      | 28.2 | 27.9 |      | 27.5 |      |      |
| 643716649 | Athe_228 |      |      |      | 29.3 |      |      |      |      |      | 29.9 |      |      |      | 26.8 |      |      |
| 643716659 | Athe_229 | 26.4 | 28.3 | 27.4 | 25.8 | 27.0 | 28.1 |      | 25.7 | 26.9 | 26.3 | 24.5 | 26.9 | 26.3 |      | 26.3 |      |
| 643716667 | Athe_230 | 33.2 | 34.4 | 33.6 | 31.6 | 31.5 | 32.0 | 31.7 | 31.3 | 31.3 | 32.1 | 32.0 | 32.6 | 31.7 | 31.5 | 31.1 |      |
| 643716668 | Athe_230 | 30.5 | 29.0 | 29.3 | 26.7 | 26.4 | 27.0 | 28.0 |      | 28.3 | 27.2 | 28.2 | 28.1 | 29.6 | 29.0 | 29.6 |      |
| 643716674 | Athe_231 | 30.8 |      |      | 32.9 | 32.3 | 33.1 | 32.5 | 32.0 | 32.3 | 32.8 | 32.7 | 33.2 | 32.6 | 32.2 | 32.3 |      |
| 643716704 | Athe_234 | 29.3 | 27.6 | 27.5 | 30.2 | 30.7 |      | 27.6 | 29.0 | 29.1 | 29.0 | 31.3 | 28.3 | 27.3 | 26.7 | 26.9 |      |
| 643716706 | Athe_234 | 25.1 | 29.0 | 27.5 |      |      |      |      |      |      |      |      |      | 24.7 | 25.8 | 25.4 |      |
| 643716725 | Athe_236 | 30.0 | 30.8 | 31.5 |      |      | 28.9 |      | 28.8 |      | 29.3 |      | 29.5 | 29.5 | 29.3 | 29.9 |      |
| 643716732 | Athe_236 | 26.3 | 27.2 |      | 27.1 |      | 27.5 |      | 27.2 | 27.0 | 25.6 | 24.9 |      | 27.3 | 26.6 | 27.1 |      |
| 643716733 | Athe_236 |      | 25.8 | 26.5 |      |      |      |      |      |      |      | 24.6 | 25.5 |      | 26.3 | 26.5 |      |
| 643716826 | Athe_246 | 25.4 | 25.8 | 27.5 | 27.2 | 26.7 | 28.2 |      | 27.6 | 23.1 | 27.6 | 23.7 |      |      | 26.4 | 23.8 |      |
| 643716827 | Athe_246 | 30.4 | 30.7 | 30.0 | 29.0 | 28.7 | 29.5 | 29.8 | 28.7 | 28.6 | 29.3 | 29.3 | 29.8 | 29.2 | 29.0 | 29.0 |      |
| 643716918 | Athe_255 | 31.4 | 32.4 | 32.0 | 29.2 | 28.1 |      |      |      |      |      |      |      |      |      |      |      |
| 643716938 | Athe_257 | 24.9 | 27.3 |      |      | 25.7 | 29.4 |      |      |      | 26.9 |      | 28.1 | 26.5 | 26.8 |      |      |
| 643717021 | Athe_265 | 28.4 | 28.7 | 27.9 |      | 27.8 |      |      |      | 27.3 |      |      | 28.2 |      | 27.2 | 27.7 |      |
| 643717077 | Athe_272 | 25.6 | 27.6 |      |      |      |      |      |      |      |      |      | 27.2 |      |      |      |      |
| 643717086 | Athe_272 | 37.7 |      | 37.6 | 36.0 | 35.7 | 36.6 |      |      | 34.3 |      | 36.8 |      |      |      | 35.8 |      |
| 643717087 | Athe_273 | 35.2 | 35.0 | 34.2 | 35.2 | 34.1 | 32.9 |      |      |      | 32.4 |      | 33.0 | 32.8 |      | 32.3 |      |
| 643717094 | Athe_273 | 31.4 | 31.6 | 31.3 |      |      |      |      |      |      | 31.0 |      | 27.8 | 30.6 | 31.0 |      |      |

1

2

| Supplementary Table S2 – Primers used for Operon PCR experiment |                                        |                                 |
|-----------------------------------------------------------------|----------------------------------------|---------------------------------|
| Primer Number                                                   | Primer Sequence                        | Primer location                 |
| JMC702                                                          | gtatgctgaaatggcaaagatgtagtc            | F Athe_1872                     |
| JMC703                                                          | gtgggtgggtgctaaccattatgaatg            | F Athe_1871                     |
| JMC704                                                          | ggttcagcgatgctaacacagc                 | R Athe_1870/Athe_1871           |
| JMC705                                                          | caattcaaagcggctactttgtatagggtag        | F Athe_1870                     |
| JMC706                                                          | cacttgcaaacacaacaactgacattagc          | R Athe_1869                     |
| JMC707                                                          | gaattatccgactgggtgtgtgtttgac           | F Athe_1869                     |
| JMC708                                                          | cgctccatcctctgtgtctgaac                | R Athe_1868                     |
| JMC365                                                          | atgagttcaagaccaagaggatggagc            | F Athe_1868                     |
| JMC709                                                          | gccatggttactccatataccactcc             | R Athe_1867                     |
| JMC710                                                          | gagaagagagcggactacaagagg               | F Athe_1867/Athe_1857/Athe_1860 |
| JMC711                                                          | ctcgcaatgccgtctcaag                    | R Athe_1859/Athe_1866           |
| JMC712                                                          | tgacagaaaattgcctgcaagatc               | F Athe_1859                     |
| JMC713                                                          | gaatgtccagtcagtgctgc                   | R Athe_1857                     |
| JMC714                                                          | ccgtgctgataggtgaatgg                   | F Athe_1866                     |
| JMC715                                                          | ccatgatgtagttacctgacatctg              | R Athe_1865                     |
| JMC716                                                          | cagatggtgacctgacgag                    | F Athe_1865                     |
| JMC717                                                          | gtatcctgtggcaatcagaattgagag            | R Athe_1864                     |
| JMC718                                                          | gcatatttagggaatccagtcatatggg           | F Athe_1864                     |
| JMC719                                                          | gcggtaaatagcatccatataaattctgttc        | R Athe_1863                     |
| JMC720                                                          | gaggtatctcctgcaaggtgg                  | F Athe_1863                     |
| JMC721                                                          | gtctgtgaatgcagttacattgtcaaattgg        | R Athe_1862                     |
| JMC722                                                          | cgtagcatttctgaaaaatggcaaattgg          | F Athe_1862                     |
| JMC723                                                          | ctcatttctcatttgccttaagctcttg           | R Athe_1861                     |
| JMC724                                                          | gaagaagagggtttaaattagctgttgac          | F Athe_1861                     |
| JMC725                                                          | accatctgtacttctgtaagcaccg              | R Athe_1860                     |
| JMC726                                                          | ttcgcaagttatctaattgaagtgacttacc        | R Athe_1856                     |
| JMC727                                                          | tggtaggatataactaacattaaaacctttagaagagc | F Athe_1856                     |
| JMC728                                                          | atgtcgaccatccatctctgttgc               | R Athe_1855/Athe_1854           |
| JMC729                                                          | gtggcatatggtcacgggc                    | F Athe_1855                     |
| JMC730                                                          | gtgtccaacttaatgcaccgtgtac              | F Athe_1854                     |
| JMC731                                                          | caacatagttgtgctgttctgaatcgg            | R Athe_1853                     |
| JMC732                                                          | gtaaagacacaggggagatacagataagg          | F Athe_1853                     |
| JMC733                                                          | tgagacaattaaaatagtcgagagaaagagtctg     | R Athe_1852                     |
| JMC571                                                          | tggtgggcaaacatgggagg                   | F in Athe_1860                  |
| JMC363                                                          | caacattccctacacgcacc                   | R in Athe_1860                  |
| JMC364                                                          | tccattaccaacagatcacatcgc               | F in Athe_1859                  |
| JMC734                                                          | cgggtcccatagtgttcttgag                 | R in Athe_1859                  |
